# Supplementary material
Source: PubMed Central journal article supplement (PMC6030588)
Supplement: rsbl20180274supp1.pdf [file rsbl20180274supp1.pdf]

## Round-trip across the Sahara: Afrotropical Painted Lady butterflies recolonize the Mediterranean in early spring

Gerard Talavera\*, Clément Bataille\*, Dubi Benyamini, Martin Gascoigne-Pees, Roger Vila

**Table S1.** Sampled *Vanessa cardui* specimens. Locality, date and  $\delta^2\text{H}$  isotope values are shown. Individual assignments to each of the 6 natal groups based on a k-means clustering analysis are indicated. For those sites where migratory movements were observed, wind direction (a.g.l), migration direction and approximate migrant frequency of pass are also specified.

| ID           | Date collected | Locality data     | Region  | lat       | long      | Elevation (m asl) | $\delta^2\text{H}$ | $\delta^2\text{H}_{\text{err}}$ | Cluster | Wind direction (a.g.l) | Migration direction | Pass Frequency |
|--------------|----------------|-------------------|---------|-----------|-----------|-------------------|--------------------|---------------------------------|---------|------------------------|---------------------|----------------|
| RVcoll17A040 | 2017-02-24     | Douar Sidi        | Morocco | 29.899687 | -9.593989 | 50                | -51                | 3.85                            | 2       | -                      | -                   | -              |
| RVcoll17A080 | 2017-02-27     | Sidi Abdel Jabbar | Morocco | 29.740444 | -8.868056 | 1305              | -58                | 3.7                             | 3       | N                      | N                   | -              |
| RVcoll17A094 | 2017-02-27     | Tazrout           | Morocco | 30.127815 | -8.886369 | 1122              | -59                | 3.67                            | 3       | N                      | N                   | 5 per minute   |
| RVcoll17A097 | 2017-02-27     | Tazrout           | Morocco | 30.127815 | -8.886369 | 1122              | -62                | 3.59                            | 3       | N                      | N                   |                |
| RVcoll17A105 | 2017-02-27     | Tazrout           | Morocco | 30.127815 | -8.886369 | 1122              | -74                | 3.34                            | 4       | N                      | N                   |                |
| RVcoll17A107 | 2017-02-27     | Tazrout           | Morocco | 30.127815 | -8.886369 | 1122              | -72                | 3.39                            | 4       | N                      | N                   |                |
| RVcoll17A113 | 2017-02-27     | Tazrout           | Morocco | 30.127815 | -8.886369 | 1122              | -70                | 3.42                            | 4       | N                      | N                   |                |
| RVcoll17A114 | 2017-02-27     | Tazrout           | Morocco | 30.127815 | -8.886369 | 1122              | -67                | 3.49                            | 4       | N                      | N                   |                |
| RVcoll17A116 | 2017-02-27     | Ait Ben Haoua     | Morocco | 30.149712 | -8.915482 | 1010              | -84                | 3.17                            | 5       | -                      | Hilltopping         | -              |
| RVcoll17A117 | 2017-02-27     | Ait Ben Haoua     | Morocco | 30.149712 | -8.915482 | 1010              | -69                | 3.45                            | 4       | -                      | Hilltopping         | -              |
| RVcoll17A139 | 2017-02-28     | Taroudant         | Morocco | 30.489348 | -8.849704 | 261               | -66                | 3.5                             | 4       | -                      | Feeding             | -              |
| RVcoll17A146 | 2017-02-28     | Taroudant         | Morocco | 30.489348 | -8.849704 | 261               | -81                | 3.22                            | 5       | -                      | Feeding             | -              |
| RVcoll17A148 | 2017-02-28     | Taroudant         | Morocco | 30.489348 | -8.849704 | 261               | -84                | 3.18                            | 5       | -                      | Feeding             | -              |
| RVcoll17A157 | 2017-02-28     | Taroudant         | Morocco | 30.489348 | -8.849704 | 261               | -61                | 3.61                            | 3       | -                      | Feeding             | -              |
| RVcoll17A158 | 2017-02-28     | Taroudant         | Morocco | 30.489348 | -8.849704 | 261               | -66                | 3.51                            | 4       | -                      | Feeding             | -              |
| RVcoll17A159 | 2017-02-28     | Taroudant         | Morocco | 30.489348 | -8.849704 | 261               | -56                | 3.74                            | 3       | -                      | Feeding             | -              |
| RVcoll17A162 | 2017-02-28     | Oulad Terma       | Morocco | 30.437764 | -8.863105 | 232               | -36                | 4.25                            | 2       | -                      | Feeding             | -              |
| RVcoll17A167 | 2017-02-28     | Oulad Terma       | Morocco | 30.437764 | -8.863105 | 232               | -52                | 3.83                            | 2       | -                      | Feeding             | -              |
| RVcoll17A172 | 2017-02-28     | Oulad Terma       | Morocco | 30.437764 | -8.863105 | 232               | -80                | 3.23                            | 5       | -                      | Feeding             | -              |
| RVcoll17A173 | 2017-02-28     | Oulad Terma       | Morocco | 30.437764 | -8.863105 | 232               | -62                | 3.59                            | 3       | -                      | Feeding             | -              |

|              |            |                                    |         |           |           |     |      |      |   |    |             |                |
|--------------|------------|------------------------------------|---------|-----------|-----------|-----|------|------|---|----|-------------|----------------|
| RVcoll17A174 | 2017-02-28 | Oulad Terma                        | Morocco | 30.437764 | -8.863105 | 232 | -67  | 3.49 | 4 | -  | Feeding     | -              |
| RVcoll17A175 | 2017-02-28 | Oulad Terma                        | Morocco | 30.437764 | -8.863105 | 232 | -61  | 3.62 | 3 | -  | Feeding     | -              |
| RVcoll17A179 | 2017-02-28 | Oulad Terma                        | Morocco | 30.437764 | -8.863105 | 232 | -61  | 3.61 | 3 | -  | Feeding     | -              |
| RVcoll17A184 | 2017-02-28 | El Koudia                          | Morocco | 30.372084 | -9.140299 | 169 | -47  | 3.97 | 2 | N  | N           | 40 per minute  |
| RVcoll17A187 | 2017-02-28 | El Koudia                          | Morocco | 30.372084 | -9.140299 | 169 | -46  | 3.98 | 2 | N  | N           |                |
| RVcoll17A209 | 2017-02-24 | Douar Sidi                         | Morocco | 29.899687 | -9.593989 | 50  | -58  | 3.69 | 3 | -  | -           | -              |
| RVcoll17A503 | 2017-03-23 | Archea Poli Festos                 | Crete   | 35.051636 | 24.811049 | 96  | -95  | 3.03 | 6 | -  | Hilltopping | -              |
| RVcoll17A504 | 2017-03-23 | Archea Poli Festos                 | Crete   | 35.051636 | 24.811049 | 96  | -79  | 3.26 | 5 | -  | Hilltopping | -              |
| RVcoll17A507 | 2017-03-23 | Archea Poli Festos                 | Crete   | 35.051636 | 24.811049 | 96  | -62  | 3.59 | 3 | -  | Hilltopping | -              |
| RVcoll17A508 | 2017-03-23 | Archea Poli Festos                 | Crete   | 35.051636 | 24.811049 | 96  | -98  | 3    | 6 | -  | Hilltopping | -              |
| RVcoll17A511 | 2017-03-21 | Ampelouzos                         | Crete   | 35.061448 | 24.935674 |     | -86  | 3.14 | 5 | W  | W           |                |
| RVcoll17A518 | 2017-03-23 | Ampelouzos                         | Crete   | 35.061448 | 24.935674 |     | -102 | 2.96 | 6 | W  | W           | < 1 per minute |
| RVcoll17A521 | 2017-03-23 | Ampelouzos                         | Crete   | 35.061448 | 24.935674 |     | -98  | 3    | 6 | W  | W           |                |
| RVcoll17A528 | 2017-03-23 | Choustoulia                        | Crete   | 35.043699 | 24.941551 | 126 | -86  | 3.14 | 5 | -  | -           | -              |
| RVcoll17A534 | 2017-03-23 | Pombia                             | Crete   | 35.043699 | 24.941551 | 129 | -56  | 3.74 | 3 | -  | -           | -              |
| RVcoll17A535 | 2021-03-24 | Archea Poli Festos                 | Crete   | 35.050938 | 24.796815 | 129 | -88  | 3.12 | 5 | -  | Hilltopping | -              |
| RVcoll17A538 | 2017-03-23 | Archea Poli Festos                 | Crete   | 35.050938 | 24.796815 | 129 | -75  | 3.33 | 4 | -  | Hilltopping | -              |
| RVcoll17A539 | 2017-03-23 | Archea Poli Festos                 | Crete   | 35.050938 | 24.796815 | 129 | -83  | 3.18 | 5 | -  | Hilltopping | -              |
| RVcoll17A541 | 2017-03-23 | Archea Poli Festos                 | Crete   | 35.050938 | 24.796815 | 129 | -99  | 2.99 | 6 | -  | Hilltopping | -              |
| RVcoll17A543 | 2017-03-23 | Archea Poli Festos                 | Crete   | 35.050938 | 24.796815 | 129 | -69  | 3.46 | 4 | -  | Hilltopping | -              |
| RVcoll17A545 | 2017-03-23 | Archea Poli Festos                 | Crete   | 35.050938 | 24.796815 | 129 | -72  | 3.4  | 4 | -  | Hilltopping | -              |
| RVcoll16E185 | 2016-3-26  | Marsa Alam, Red Sea                | Egypt   | 25.345409 | 34.735321 |     | -71  | 3.4  | 4 | NW | N           | < 1 per minute |
| RVcoll16E186 | 2016-4-2   | Marsa Alam, Red Sea                | Egypt   | 25.344028 | 34.7355   | -28 | 110  | 4.52 | 1 | NW | N           |                |
| RVcoll16E187 | 2016-4-2   | Rosh Pina, Galilee                 | Israel  | 32.968889 | 35.540861 | 407 | -56  | 3.99 | 3 | -  | -           | -              |
| RVcoll16E200 | 2016-4-6   | Kiriat Gat                         | Israel  | 31.619192 | 34.767192 | 110 | -57  | 3.97 | 3 | -  | -           | -              |
| RVcoll16E201 | 2016-2-19  | Hirbet Za'ak N. Negev              | Israel  | 31.414722 | 34.866861 | 394 | -8   | 5.3  | 1 | -  | -           | -              |
| RVcoll16E202 | 2016-2-19  | Hirbet Za'ak N. Negev              | Israel  | 31.414722 | 34.866861 | 394 | -19  | 4.97 | 1 | -  | -           | -              |
| RVcoll16E203 | 2016-2-19  | Hirbet Za'ak N. Negev              | Israel  | 31.414722 | 34.866861 | 394 | -67  | 3.75 | 4 | -  | -           | -              |
| RVcoll16E204 | 2016-2-19  | Hirbet Za'ak N. Negev              | Israel  | 31.414722 | 34.866861 | 394 | -4   | 5.41 | 1 | -  | -           | -              |
| RVcoll16E205 | 2016-2-19  | Hirbet Za'ak N. Negev              | Israel  | 31.414722 | 34.866861 | 394 | -65  | 3.8  | 4 | -  | -           | -              |
| RVcoll16E206 | 2016-2-19  | Hirbet Za'ak N. Negev              | Israel  | 31.414722 | 34.866861 | 394 | -72  | 3.66 | 4 | -  | -           | -              |
| RVcoll14L416 | 2014-03-15 | Uvda, S. Negev                     | Israel  | 29.93866  | 34.957784 | 434 | -53  | 4.07 | 3 | -  | -           | -              |
| RVcoll14L417 | 2014-03-22 | Avivim                             | Israel  | 33.082683 | 35.458307 | 637 | -37  | 4.46 | 2 | -  | -           | -              |
| RVcoll14L420 | 2014-03-19 | Kiriat Gat                         | Israel  | 31.680879 | 34.845764 | -48 |      | 3.92 | 2 | -  | -           | -              |
| RVcoll14L429 | 2014-03-19 | Ein Yahav, Araba Rift Valley       | Israel  | 30.704816 | 35.220757 | -97 | -45  | 4.25 | 2 | -  | -           | -              |
| RVcoll16D616 | 2014-03-18 | Nahal Hiyon, Uvda valley, S. Negev | Israel  | 29.93866  | 34.957784 | -52 | 405  | 4.09 | 2 | -  | -           | -              |

|              |            |                                    |           |           |           |     |      |      |   |    |    |   |
|--------------|------------|------------------------------------|-----------|-----------|-----------|-----|------|------|---|----|----|---|
| RVcoll16D617 | 2015-02-25 | Nahal Hiyon, Uvda valley, S. Negev | Israel    | 29.93866  | 34.957784 | -72 | 405  | 3.66 | 4 | -  | -  | - |
| RVcoll16D628 | 2016-02-12 | Nahal Shita S. Arava               | Israel    | 30.143903 | 35.125221 | 240 | -63  | 3.85 | 3 | -  | -  | - |
| RVcoll16D629 | 2016-02-12 | Nahal Shita S. Arava               | Israel    | 30.143903 | 35.125221 | 240 | -63  | 3.83 | 3 | -  | -  | - |
| RVcoll16D633 | 2016-02-16 | Hirbat Za'ak N. Negev              | Israel    | 31.414722 | 34.866861 | 400 | -69  | 3.72 | 4 | -  | -  | - |
| RVcoll16D634 | 2016-02-16 | Hirbat Za'ak N. Negev              | Israel    | 31.414722 | 34.866861 | 400 | -84  | 3.47 | 5 | -  | -  | - |
| RVcoll16D635 | 2016-02-16 | Hirbat Za'ak N. Negev              | Israel    | 31.414722 | 34.866861 | 400 | -79  | 3.54 | 5 | -  | -  | - |
| RVcoll16D643 | 2016-02-12 | Nahal Shita S. Arava               | Israel    | 30.143903 | 35.125221 | 240 | -69  | 3.72 | 4 | -  | -  | - |
| RVcoll16D644 | 2016-02-16 | Hirbat Za'ak N. Negev              | Israel    | 31.414722 | 34.866861 | 400 | -70  | 3.69 | 4 | -  | -  | - |
| RVcoll16D645 | 2016-02-16 | Hirbat Za'ak N. Negev              | Israel    | 31.414722 | 34.866861 | 400 | -40  | 4.4  | 2 | -  | -  | - |
| RVcoll16D646 | 2016-02-16 | Hirbat Za'ak N. Negev              | Israel    | 31.414722 | 34.866861 | 400 | -61  | 3.88 | 3 | -  | -  | - |
| RVcoll16D647 | 2016-02-16 | Hirbat Za'ak N. Negev              | Israel    | 31.414722 | 34.866861 | 400 | -82  | 3.49 | 5 | -  | -  | - |
| RVcoll14M260 | 2012-04-27 | Delta del Llobregat                | Catalonia | 41.274706 | 2.063474  | 0   | -66  | 3.78 | 4 | NW | NW | - |
| RVcoll14M261 | 2012-04-27 | Delta del Llobregat                | Catalonia | 41.274706 | 2.063474  | 0   | -68  | 3.75 | 4 | NW | NW | - |
| RVcoll14M265 | 2012-04-27 | Delta del Llobregat                | Catalonia | 41.274706 | 2.063474  | 0   | -62  | 3.86 | 3 | NW | NW | - |
| RVcoll14M266 | 2012-04-27 | Delta del Llobregat                | Catalonia | 41.274706 | 2.063474  | 0   | -78  | 3.56 | 5 | NW | NW | - |
| RVcoll14M270 | 2012-04-28 | Delta del Llobregat                | Catalonia | 41.274706 | 2.063474  | 0   | -58  | 3.94 | 3 | NW | NW | - |
| RVcoll14M274 | 2012-04-28 | Delta del Llobregat                | Catalonia | 41.274706 | 2.063474  | 0   | -65  | 3.54 | 4 | NW | NW | - |
| RVcoll14M275 | 2012-04-28 | Delta del Llobregat                | Catalonia | 41.274706 | 2.063474  | 0   | -72  | 3.66 | 4 | NW | NW | - |
| RVcoll14M276 | 2012-04-28 | Delta del Llobregat                | Catalonia | 41.274706 | 2.063474  | 0   | -71  | 3.67 | 4 | NW | NW | - |
| RVcoll14M281 | 2012-04-28 | Delta del Llobregat                | Catalonia | 41.274706 | 2.063474  | 0   | -61  | 3.88 | 3 | NW | NW | - |
| RVcoll14M282 | 2012-04-28 | Delta del Llobregat                | Catalonia | 41.274706 | 2.063474  | 0   | -63  | 3.84 | 3 | NW | NW | - |
| RVcoll16C400 | 2016-02-23 | Maro, Málaga                       | Andalusia | 36.753828 | -3.844969 | -80 | 3.53 | 5    | - | -  | -  | - |
| RVcoll16C403 | 2016-02-24 | Bédar, Almería                     | Andalusia | 37.186352 | -1.980592 | -71 | 3.67 | 4    | - | -  | -  | - |
| RVcoll16C404 | 2016-02-23 | Frigiliana, Málaga                 | Andalusia | 36.784991 | -3.899151 | -60 | 3.65 | 3    | - | -  | -  | - |
| RVcoll16C407 | 2016-02-23 | Maro, Málaga                       | Andalusia | 36.753828 | -3.844969 | -72 | 3.38 | 4    | - | -  | -  | - |
| RVcoll16C409 | 2016-02-25 | Mojácar, Almería                   | Andalusia | 37.102125 | -1.848237 | -50 | 3.9  | 2    | - | -  | -  | - |
| RVcoll16C412 | 2016-02-24 | Bédar, Almería                     | Andalusia | 37.186352 | -1.980592 | -40 | 4.17 | 2    | - | -  | -  | - |
| RVcoll16C413 | 2016-02-16 | Mojácar, Almería                   | Andalusia | 37.102125 | -1.848237 | -36 | 4.28 | 2    | - | -  | -  | - |
| RVcoll16C416 | 2016-02-25 | Mojácar, Almería                   | Andalusia | 37.102125 | -1.848237 | -60 | 3.65 | 3    | - | -  | -  | - |
| RVcoll16C423 | 2016-02-25 | Mojácar, Almería                   | Andalusia | 37.102125 | -1.848237 | -77 | 3.29 | 5    | - | -  | -  | - |
| RVcoll16C425 | 2016-02-16 | Mojácar, Almería                   | Andalusia | 37.102125 | -1.848237 | -47 | 3.98 | 2    | - | -  | -  | - |

10 per minute

Sudden increase on 2016-02-21 (occurrences by hundreds at some localities)
